# Supplementary material
Source: publisher figshare collection journal article supplement (https://acs.figshare.com/ndownloader/files/5337898)
Supplement: Supplementary file 1 [file 5337898]

data_global
_publ_requested_journal          'Journal of the American Chemical Society'
_publ_contact_author_name        'Zhenan Bao'
_publ_contact_author_address     
; 
Department of Chemistry and Chemical Engineering
Stanford University
381 North-South Mall,
Stanford, California 94305
;
_publ_contact_author_email       zbao@stanford.edu

_publ_contact_author_phone       
;+1 650-723-2419
;
loop_
_publ_author_name
_publ_author_address

'Tang, Ming L.'
; 
Department of Chemistry
Stanford University 
381 North-South Mall
Stanford, California 
94305
;

'Reichardt, Anna D.'
;
Department of Chemistry 
Stanford University 
381 North-South Mall
Stanford, California 
94305
;
'Miyaki, Nobuyuki.'
;
Department of Chemical Engineering 
Stanford University 
381 North-South Mall
Stanford, California 
94305
;
'Stoltenberg, Randall M.'
;
Department of Chemistry 
Stanford University 
381 North-South Mall
Stanford, California 
94305
;
'Bao, Zhenan'
;
Department of Chemical Engineering 
Stanford University 
381 North-South Mall
Stanford, California 
94305
;


data_x07162xs 

# start Validation Reply Form
_vrf_PLAT432_x07162xs
;
PROBLEM: Short Inter X...Y Contact  F1     ..  C14'    ..       2.57 Ang. 
RESPONSE: This is not a 'real' contact.  The nature of disorder in these
crystals is rather complex, and in this case it seems to have caused checkCIF
to erroneously calculate a short 'contact' between atom F1 and a symmetry 
related C14'.  Since the sum of the occupancies of these atoms is less 
than 1.0 there is no reason that these atoms should ever clash in the way
suggested by checkCIF.
;
# end Validation Reply Form
 
_audit_creation_method            SHELXL-97 
_chemical_name_systematic 
'7,8,9,10-tetrafluoro-5,12-bis(triisopropylsilylethynyl)tetraceno[2,3-b]thiophene'
_chemical_name_common             ? 
_chemical_melting_point           ? 
_chemical_formula_moiety 
 'C42 H48 F4 S Si2' 
_chemical_formula_sum 
 'C42 H48 F4 S Si2' 
_chemical_formula_weight          717.04 
 
loop_ 
 _atom_type_symbol 
 _atom_type_description 
 _atom_type_scat_dispersion_real 
 _atom_type_scat_dispersion_imag 
 _atom_type_scat_source 
 'C'  'C'   0.0181   0.0091 
 'International Tables Vol C Tables 4.2.6.8 and 6.1.1.4' 
 'H'  'H'   0.0000   0.0000 
 'International Tables Vol C Tables 4.2.6.8 and 6.1.1.4' 
 'F'  'F'   0.0727   0.0534 
 'International Tables Vol C Tables 4.2.6.8 and 6.1.1.4' 
 'Si'  'Si'   0.2541   0.3302 
 'International Tables Vol C Tables 4.2.6.8 and 6.1.1.4' 
 'S'  'S'   0.3331   0.5567 
 'International Tables Vol C Tables 4.2.6.8 and 6.1.1.4' 
 
_symmetry_cell_setting            triclinic
_symmetry_space_group_name_H-M    'P -1'
_symmetry_space_group_name_Hall   '-P 1'
 
loop_ 
 _symmetry_equiv_pos_as_xyz 
 'x, y, z' 
 '-x, -y, -z' 
 
_cell_length_a                    7.6139(4) 
_cell_length_b                    7.6363(4) 
_cell_length_c                    16.8065(8) 
_cell_angle_alpha                 89.186(2) 
_cell_angle_beta                  78.148(3) 
_cell_angle_gamma                 84.510(3) 
_cell_volume                      951.93(8) 
_cell_formula_units_Z             1 
_cell_measurement_temperature     90.0(2) 
_cell_measurement_reflns_used     6929
_cell_measurement_theta_min       2.69
_cell_measurement_theta_max       68.29
 
_exptl_crystal_description        flake
_exptl_crystal_colour             'purple-red'
_exptl_crystal_size_max           0.30 
_exptl_crystal_size_mid           0.14 
_exptl_crystal_size_min           0.01 
_exptl_crystal_density_meas       ? 
_exptl_crystal_density_diffrn     1.251 
_exptl_crystal_density_method     'not measured' 
_exptl_crystal_F_000              380 
_exptl_absorpt_coefficient_mu     1.755 
_exptl_absorpt_correction_type    multi-scan 
_exptl_absorpt_correction_T_min   0.6765 
_exptl_absorpt_correction_T_max   0.9827 
_exptl_absorpt_process_details    'Sadabs in APEX2 (BrukerAXS, 2006)' 
 
_exptl_special_details 
; 
 ? 
; 
 
_diffrn_ambient_temperature       90.0(2) 
_diffrn_radiation_wavelength      1.54178 
_diffrn_radiation_type            CuK\a 
_diffrn_radiation_source          'fine-focus rotating anode' 
_diffrn_radiation_monochromator   'graded multilayer optics' 
_diffrn_measurement_device_type   'Bruker X8 Proteum diffractometer'
_diffrn_measurement_method        '\f and \w scans'            
_diffrn_detector_area_resol_mean  18
_diffrn_standards_number          0 
_diffrn_standards_interval_count  . 
_diffrn_standards_interval_time   . 
_diffrn_standards_decay_%         ? 
_diffrn_reflns_number             3467 
_diffrn_reflns_av_R_equivalents   0.0000 
_diffrn_reflns_av_sigmaI/netI     0.0419 
_diffrn_reflns_limit_h_min        -8 
_diffrn_reflns_limit_h_max        9 
_diffrn_reflns_limit_k_min        -9 
_diffrn_reflns_limit_k_max        9 
_diffrn_reflns_limit_l_min        0 
_diffrn_reflns_limit_l_max        20 
_diffrn_reflns_theta_min          2.69 
_diffrn_reflns_theta_max          68.89 
_reflns_number_total              3467 
_reflns_number_gt                 3013 
_reflns_threshold_expression      >2\s(I)    
 
_computing_data_collection        'APEX2 (Bruker-AXS, 2006)'            
_computing_cell_refinement        'APEX2'            
_computing_data_reduction         'APEX2'            
_computing_structure_solution     'SHELXS-97 (Sheldrick, 2008)' 
_computing_structure_refinement   'SHELXL-97 (Sheldrick, 2008)' 
_computing_molecular_graphics     'XP in SHELXTL (Sheldrick, 2008)'
_computing_publication_material
; 
SHELX97-2 (Sheldrick, 2008) and local procedures 
; 
 
_publ_section_exptl_refinement
;
H atoms were found in difference Fourier maps and subsequently placed in
idealized positions with constrained C-H distances of 0.98 \%A (RCH~3~),
1.00 \%A (R~3~CH) and 0.95 \%A (C~Ar~H) with U~iso~(H) values set to 
either 1.5U~eq~ (RCH~3~ only) or 1.2U~eq~ of the attached C atom.
;

_refine_special_details 
; 
 Refinement of F^2^ against ALL reflections.  The weighted R-factor wR and 
 goodness of fit S are based on F^2^, conventional R-factors R are based 
 on F, with F set to zero for negative F^2^. The threshold expression of 
 F^2^ > 2\s(F^2^) is used only for calculating R-factors(gt) etc. and is 
 not relevant to the choice of reflections for refinement.  R-factors based 
 on F^2^ are statistically about twice as large as those based on F, and R- 
 factors based on ALL data will be even larger. 
; 
 
_refine_ls_structure_factor_coef  Fsqd  
_refine_ls_matrix_type            full 
_refine_ls_weighting_scheme       calc  
_refine_ls_weighting_details 
 'calc w=1/[\s^2^(Fo^2^)+(0.0000P)^2^+4.6094P] where P=(Fo^2^+2Fc^2^)/3' 
_atom_sites_solution_primary      direct 
_atom_sites_solution_secondary    difmap 
_atom_sites_solution_hydrogens    geom 
_refine_ls_hydrogen_treatment     constr 
_refine_ls_extinction_method      none 
_refine_ls_extinction_coef        ? 
_refine_ls_number_reflns          3467 
_refine_ls_number_parameters      284 
_refine_ls_number_restraints      423 
_refine_ls_R_factor_all           0.0971 
_refine_ls_R_factor_gt            0.0866 
_refine_ls_wR_factor_ref          0.2113 
_refine_ls_wR_factor_gt           0.2060 
_refine_ls_goodness_of_fit_ref    1.154 
_refine_ls_restrained_S_all       1.124 
_refine_ls_shift/su_max           0.000 
_refine_ls_shift/su_mean          0.000 
 
loop_ 
 _atom_site_label 
 _atom_site_type_symbol 
 _atom_site_fract_x 
 _atom_site_fract_y 
 _atom_site_fract_z 
 _atom_site_U_iso_or_equiv 
 _atom_site_adp_type 
 _atom_site_occupancy 
 _atom_site_symmetry_multiplicity 
 _atom_site_calc_flag 
 _atom_site_refinement_flags 
 _atom_site_disorder_assembly 
 _atom_site_disorder_group 
C1 C 0.4439(6) 0.4401(5) 0.0803(3) 0.0290(10) Uani 1 1 d . . . 
C2 C 0.6205(6) 0.3941(5) 0.0388(3) 0.0299(10) Uani 1 1 d . B . 
C3 C 0.7473(6) 0.2920(5) 0.0759(3) 0.0291(9) Uani 1 1 d DU . . 
H3 H 0.7110 0.2524 0.1301 0.035 Uiso 1 1 calc R A 1 
C4 C 0.9203(5) 0.2497(5) 0.0350(3) 0.0304(8) Uani 0.50 1 d PDU B 1 
C5 C 1.0371(13) 0.1500(17) 0.0733(6) 0.0301(19) Uani 0.50 1 d PDU B 1 
C6A C 1.2070(12) 0.1107(16) 0.0293(6) 0.0277(13) Uani 0.50 1 d PDU B 1 
C6B C 1.2627(12) 0.1636(14) -0.0502(5) 0.0277(13) Uani 0.50 1 d PDU B 1 
C7 C 1.1506(12) 0.2669(16) -0.0901(5) 0.0284(19) Uani 0.50 1 d PDU B 1 
C8 C 0.9784(5) 0.3049(5) -0.0475(3) 0.0314(8) Uani 0.50 1 d PDU B 1 
C4' C 0.9203(5) 0.2497(5) 0.0350(3) 0.0304(8) Uani 0.25 1 d PDU B 2 
S5' S 1.1136(8) 0.1254(7) 0.0674(3) 0.0253(10) Uani 0.25 1 d PDU B 2 
C6' C 1.261(2) 0.146(3) -0.0248(10) 0.0297(19) Uiso 0.25 1 d PDU B 2 
H6' H 1.3837 0.1008 -0.0396 0.036 Uiso 0.25 1 calc PR B 2 
C7' C 1.1638(18) 0.238(4) -0.0699(15) 0.033(2) Uiso 0.25 1 d PDU B 2 
H7' H 1.2238 0.2628 -0.1236 0.040 Uiso 0.25 1 calc PR B 2 
C8' C 0.9784(5) 0.3049(5) -0.0475(3) 0.0314(8) Uani 0.25 1 d PDU B 2 
C4'' C 0.9203(5) 0.2497(5) 0.0350(3) 0.0304(8) Uani 0.25 1 d PDU B 3 
C5'' C 1.075(2) 0.157(4) 0.0569(15) 0.029(2) Uiso 0.25 1 d PDU B 3 
H5'' H 1.0611 0.1167 0.1114 0.035 Uiso 0.25 1 calc PR B 3 
C6'' C 1.235(2) 0.120(4) 0.0100(10) 0.0297(19) Uiso 0.25 1 d PDU B 3 
H6'' H 1.3368 0.0549 0.0238 0.036 Uiso 0.25 1 calc PR B 3 
S7'' S 1.2177(8) 0.2159(9) -0.0821(4) 0.0338(12) Uani 0.25 1 d PDU B 3 
C8'' C 0.9784(5) 0.3049(5) -0.0475(3) 0.0314(8) Uani 0.25 1 d PDU B 3 
C9 C 0.8571(6) 0.4056(5) -0.0839(3) 0.0309(10) Uani 1 1 d DU . . 
H9 H 0.8955 0.4440 -0.1382 0.037 Uiso 1 1 calc R B 1 
C10 C 0.6802(6) 0.4528(5) -0.0437(3) 0.0279(9) Uani 1 1 d . . . 
C11 C 0.3837(7) 0.3746(6) 0.1608(3) 0.0331(11) Uani 1 1 d . . . 
Si1 Si 0.24607(18) 0.21246(16) 0.32534(7) 0.0288(3) Uani 1 1 d . . . 
C12 C 0.3335(7) 0.3140(6) 0.2258(3) 0.0351(11) Uani 1 1 d . C . 
C13 C -0.0083(7) 0.2559(8) 0.3468(3) 0.0508(13) Uani 0.642(12) 1 d PDU C 1 
H13 H -0.0332 0.1958 0.2984 0.061 Uiso 0.642(12) 1 calc PR C 1 
C14 C -0.0974(16) 0.1414(17) 0.4117(7) 0.044(3) Uani 0.642(12) 1 d PDU C 1 
H14A H -0.0234 0.0291 0.4114 0.066 Uiso 0.642(12) 1 calc PR C 1 
H14B H -0.2162 0.1201 0.4021 0.066 Uiso 0.642(12) 1 calc PR C 1 
H14C H -0.1115 0.1994 0.4646 0.066 Uiso 0.642(12) 1 calc PR C 1 
C15 C -0.0872(13) 0.4344(13) 0.3336(7) 0.065(3) Uani 0.642(12) 1 d PDU C 1 
H15A H -0.0077 0.4894 0.2889 0.098 Uiso 0.642(12) 1 calc PR C 1 
H15B H -0.1009 0.5045 0.3833 0.098 Uiso 0.642(12) 1 calc PR C 1 
H15C H -0.2055 0.4284 0.3199 0.098 Uiso 0.642(12) 1 calc PR C 1 
C13' C -0.0083(7) 0.2559(8) 0.3468(3) 0.0508(13) Uani 0.358(12) 1 d PDU C 2 
H13' H -0.0169 0.3805 0.3659 0.061 Uiso 0.358(12) 1 calc PR C 2 
C14' C -0.099(2) 0.289(2) 0.2784(8) 0.048(4) Uiso 0.358(12) 1 d PDU C 2 
H14D H -0.0179 0.3405 0.2333 0.073 Uiso 0.358(12) 1 calc PR C 2 
H14E H -0.2080 0.3697 0.2956 0.073 Uiso 0.358(12) 1 calc PR C 2 
H14F H -0.1331 0.1772 0.2604 0.073 Uiso 0.358(12) 1 calc PR C 2 
C15' C -0.099(4) 0.180(4) 0.4239(11) 0.052(5) Uiso 0.358(12) 1 d PDU C 2 
H15D H -0.0170 0.1709 0.4621 0.078 Uiso 0.358(12) 1 calc PR C 2 
H15E H -0.1318 0.0629 0.4135 0.078 Uiso 0.358(12) 1 calc PR C 2 
H15F H -0.2078 0.2562 0.4472 0.078 Uiso 0.358(12) 1 calc PR C 2 
C16 C 0.3541(7) 0.3136(6) 0.4025(3) 0.0386(11) Uani 1 1 d . C . 
H16 H 0.4872 0.2953 0.3813 0.046 Uiso 1 1 calc R . . 
C17 C 0.3078(12) 0.5096(8) 0.4122(4) 0.075(2) Uani 1 1 d . . . 
H17A H 0.1767 0.5353 0.4279 0.113 Uiso 1 1 calc R C . 
H17B H 0.3522 0.5676 0.3605 0.113 Uiso 1 1 calc R . . 
H17C H 0.3644 0.5533 0.4544 0.113 Uiso 1 1 calc R . . 
C18 C 0.3185(8) 0.2242(8) 0.4852(3) 0.0480(14) Uani 1 1 d . . . 
H18A H 0.3832 0.2787 0.5216 0.072 Uiso 1 1 calc R C . 
H18B H 0.3604 0.0988 0.4787 0.072 Uiso 1 1 calc R . . 
H18C H 0.1889 0.2376 0.5085 0.072 Uiso 1 1 calc R . . 
C19 C 0.3175(7) -0.0284(6) 0.3173(3) 0.0387(12) Uani 1 1 d . C . 
H19 H 0.2708 -0.0812 0.3714 0.046 Uiso 1 1 calc R . . 
C20 C 0.5224(9) -0.0628(8) 0.2999(4) 0.0593(16) Uani 1 1 d . . . 
H20A H 0.5569 -0.1897 0.2943 0.089 Uiso 1 1 calc R C . 
H20B H 0.5688 -0.0167 0.3449 0.089 Uiso 1 1 calc R . . 
H20C H 0.5733 -0.0040 0.2494 0.089 Uiso 1 1 calc R . . 
C21 C 0.2395(11) -0.1213(7) 0.2544(4) 0.0648(19) Uani 1 1 d . . . 
H21A H 0.2753 -0.0666 0.2011 0.097 Uiso 1 1 calc R C . 
H21B H 0.1076 -0.1109 0.2704 0.097 Uiso 1 1 calc R . . 
H21C H 0.2854 -0.2459 0.2512 0.097 Uiso 1 1 calc R . . 
F1 F 0.9781(7) 0.1028(6) 0.1476(3) 0.0317(11) Uani 0.50 1 d PD B 1 
F2 F 1.3211(8) 0.0146(7) 0.0626(3) 0.0385(13) Uani 0.50 1 d PD B 1 
F3 F 1.4273(8) 0.1259(8) -0.0886(3) 0.0430(14) Uani 0.50 1 d PD B 1 
F4 F 1.1926(7) 0.3235(7) -0.1641(3) 0.0343(12) Uani 0.50 1 d PD B 1 
 
loop_ 
 _atom_site_aniso_label 
 _atom_site_aniso_U_11 
 _atom_site_aniso_U_22 
 _atom_site_aniso_U_33 
 _atom_site_aniso_U_23 
 _atom_site_aniso_U_13 
 _atom_site_aniso_U_12 
C1 0.042(3) 0.019(2) 0.026(2) 0.0015(16) -0.0045(19) -0.0106(19) 
C2 0.042(3) 0.020(2) 0.027(2) -0.0006(16) -0.0018(19) -0.0093(19) 
C3 0.041(2) 0.020(2) 0.028(2) -0.0010(16) -0.0065(18) -0.0086(18) 
C4 0.0410(18) 0.0215(16) 0.0293(16) -0.0014(14) -0.0048(15) -0.0113(14) 
C5 0.039(4) 0.024(3) 0.026(3) 0.001(3) 0.001(3) -0.013(3) 
C6A 0.031(2) 0.022(2) 0.032(3) -0.002(2) -0.009(2) -0.006(2) 
C6B 0.031(2) 0.022(2) 0.032(3) -0.002(2) -0.009(2) -0.006(2) 
C7 0.041(4) 0.022(4) 0.023(3) 0.005(3) -0.006(3) -0.008(3) 
C8 0.0407(18) 0.0238(16) 0.0293(16) -0.0006(14) -0.0033(15) -0.0097(15) 
C4' 0.0410(18) 0.0215(16) 0.0293(16) -0.0014(14) -0.0048(15) -0.0113(14) 
S5' 0.033(3) 0.015(2) 0.032(2) 0.0064(18) -0.018(2) -0.002(2) 
C8' 0.0407(18) 0.0238(16) 0.0293(16) -0.0006(14) -0.0033(15) -0.0097(15) 
C4'' 0.0410(18) 0.0215(16) 0.0293(16) -0.0014(14) -0.0048(15) -0.0113(14) 
S7'' 0.037(3) 0.026(3) 0.035(3) 0.001(2) 0.000(2) -0.005(2) 
C8'' 0.0407(18) 0.0238(16) 0.0293(16) -0.0006(14) -0.0033(15) -0.0097(15) 
C9 0.042(2) 0.027(2) 0.025(2) 0.0001(16) -0.0034(18) -0.0132(19) 
C10 0.039(3) 0.019(2) 0.027(2) -0.0005(16) -0.0067(18) -0.0092(18) 
C11 0.044(3) 0.025(2) 0.028(2) 0.0001(18) -0.002(2) -0.008(2) 
Si1 0.0370(7) 0.0259(6) 0.0227(6) 0.0079(4) -0.0024(5) -0.0082(5) 
C12 0.045(3) 0.029(2) 0.030(2) 0.0091(19) -0.003(2) -0.006(2) 
C13 0.040(3) 0.059(3) 0.055(3) 0.028(2) -0.012(2) -0.010(2) 
C14 0.031(4) 0.053(6) 0.051(5) 0.017(5) -0.009(4) -0.015(4) 
C15 0.049(5) 0.059(5) 0.076(6) 0.025(5) 0.007(5) 0.007(4) 
C13' 0.040(3) 0.059(3) 0.055(3) 0.028(2) -0.012(2) -0.010(2) 
C16 0.044(3) 0.036(3) 0.037(3) 0.008(2) -0.007(2) -0.014(2) 
C17 0.142(7) 0.037(3) 0.065(4) 0.010(3) -0.060(5) -0.025(4) 
C18 0.061(4) 0.054(3) 0.038(3) 0.010(2) -0.022(3) -0.023(3) 
C19 0.057(3) 0.030(2) 0.028(2) 0.0094(19) -0.006(2) -0.005(2) 
C20 0.063(4) 0.051(3) 0.055(4) 0.005(3) 0.004(3) 0.009(3) 
C21 0.117(6) 0.034(3) 0.049(3) -0.002(2) -0.033(4) -0.002(3) 
F1 0.039(3) 0.033(3) 0.024(2) 0.007(2) -0.008(2) -0.005(2) 
F2 0.054(4) 0.035(3) 0.030(3) 0.002(2) -0.016(2) -0.007(3) 
F3 0.042(3) 0.048(3) 0.036(3) 0.001(2) 0.001(2) -0.010(3) 
F4 0.034(3) 0.042(3) 0.024(2) 0.005(2) 0.002(2) -0.007(2) 
 
_geom_special_details 
; 
 All esds (except the esd in the dihedral angle between two l.s. planes) 
 are estimated using the full covariance matrix.  The cell esds are taken 
 into account individually in the estimation of esds in distances, angles 
 and torsion angles; correlations between esds in cell parameters are only 
 used when they are defined by crystal symmetry.  An approximate (isotropic) 
 treatment of cell esds is used for estimating esds involving l.s. planes. 
; 
 
loop_ 
 _geom_bond_atom_site_label_1 
 _geom_bond_atom_site_label_2 
 _geom_bond_distance 
 _geom_bond_site_symmetry_2 
 _geom_bond_publ_flag 
C1 C2 1.396(7) . ? 
C1 C10 1.420(6) 2_665 ? 
C1 C11 1.435(6) . ? 
C2 C3 1.421(6) . ? 
C2 C10 1.446(6) . ? 
C3 C4 1.366(5) . ? 
C3 H3 0.9500 . ? 
C4 C5 1.370(8) . ? 
C4 C8 1.436(6) . ? 
C5 F1 1.295(9) . ? 
C5 C6A 1.360(9) . ? 
C6A F2 1.293(10) . ? 
C6A C6B 1.383(9) . ? 
C6B F3 1.294(9) . ? 
C6B C7 1.376(9) . ? 
C7 F4 1.297(9) . ? 
C7 C8 1.365(7) . ? 
C8 C9 1.380(5) . ? 
S5' C6' 1.730(16) . ? 
C6' C7' 1.31(2) . ? 
C6' H6' 0.9500 . ? 
C7' H7' 0.9500 . ? 
C5'' C6'' 1.31(2) . ? 
C5'' H5'' 0.9500 . ? 
C6'' S7'' 1.727(16) . ? 
C6'' H6'' 0.9500 . ? 
C9 C10 1.394(6) . ? 
C9 H9 0.9500 . ? 
C10 C1 1.420(6) 2_665 ? 
C11 C12 1.183(6) . ? 
Si1 C12 1.857(4) . ? 
Si1 C19 1.866(5) . ? 
Si1 C16 1.882(5) . ? 
Si1 C13 1.894(6) . ? 
C13 C15 1.468(10) . ? 
C13 C14 1.482(9) . ? 
C13 H13 1.0000 . ? 
C14 H14A 0.9800 . ? 
C14 H14B 0.9800 . ? 
C14 H14C 0.9800 . ? 
C15 H15A 0.9800 . ? 
C15 H15B 0.9800 . ? 
C15 H15C 0.9800 . ? 
C14' H14D 0.9800 . ? 
C14' H14E 0.9800 . ? 
C14' H14F 0.9800 . ? 
C15' H15D 0.9800 . ? 
C15' H15E 0.9800 . ? 
C15' H15F 0.9800 . ? 
C16 C17 1.507(8) . ? 
C16 C18 1.525(7) . ? 
C16 H16 1.0000 . ? 
C17 H17A 0.9800 . ? 
C17 H17B 0.9800 . ? 
C17 H17C 0.9800 . ? 
C18 H18A 0.9800 . ? 
C18 H18B 0.9800 . ? 
C18 H18C 0.9800 . ? 
C19 C20 1.525(8) . ? 
C19 C21 1.528(8) . ? 
C19 H19 1.0000 . ? 
C20 H20A 0.9800 . ? 
C20 H20B 0.9800 . ? 
C20 H20C 0.9800 . ? 
C21 H21A 0.9800 . ? 
C21 H21B 0.9800 . ? 
C21 H21C 0.9800 . ? 
 
loop_ 
 _geom_angle_atom_site_label_1 
 _geom_angle_atom_site_label_2 
 _geom_angle_atom_site_label_3 
 _geom_angle 
 _geom_angle_site_symmetry_1 
 _geom_angle_site_symmetry_3 
 _geom_angle_publ_flag 
C2 C1 C10 121.3(4) . 2_665 ? 
C2 C1 C11 119.9(4) . . ? 
C10 C1 C11 118.8(4) 2_665 . ? 
C1 C2 C3 121.7(4) . . ? 
C1 C2 C10 120.3(4) . . ? 
C3 C2 C10 118.0(4) . . ? 
C4 C3 C2 121.2(4) . . ? 
C4 C3 H3 119.4 . . ? 
C2 C3 H3 119.4 . . ? 
C3 C4 C5 118.9(5) . . ? 
C3 C4 C8 120.8(4) . . ? 
C5 C4 C8 120.3(5) . . ? 
F1 C5 C6A 125.7(8) . . ? 
F1 C5 C4 118.0(8) . . ? 
C6A C5 C4 116.3(6) . . ? 
F2 C6A C5 118.4(7) . . ? 
F2 C6A C6B 118.1(7) . . ? 
C5 C6A C6B 123.4(6) . . ? 
F3 C6B C7 117.1(7) . . ? 
F3 C6B C6A 120.8(7) . . ? 
C7 C6B C6A 122.0(6) . . ? 
F4 C7 C8 118.7(8) . . ? 
F4 C7 C6B 125.9(8) . . ? 
C8 C7 C6B 115.4(6) . . ? 
C7 C8 C9 118.8(5) . . ? 
C7 C8 C4 122.6(4) . . ? 
C9 C8 C4 118.6(4) . . ? 
C7' C6' S5' 104.4(12) . . ? 
C7' C6' H6' 127.8 . . ? 
S5' C6' H6' 127.8 . . ? 
C6' C7' H7' 116.2 . . ? 
C6'' C5'' H5'' 116.4 . . ? 
C5'' C6'' S7'' 104.8(12) . . ? 
C5'' C6'' H6'' 127.6 . . ? 
S7'' C6'' H6'' 127.6 . . ? 
C8 C9 C10 122.1(4) . . ? 
C8 C9 H9 119.0 . . ? 
C10 C9 H9 119.0 . . ? 
C9 C10 C1 122.3(4) . 2_665 ? 
C9 C10 C2 119.3(4) . . ? 
C1 C10 C2 118.4(4) 2_665 . ? 
C12 C11 C1 177.2(5) . . ? 
C12 Si1 C19 108.1(2) . . ? 
C12 Si1 C16 107.0(2) . . ? 
C19 Si1 C16 109.4(2) . . ? 
C12 Si1 C13 107.3(2) . . ? 
C19 Si1 C13 111.1(3) . . ? 
C16 Si1 C13 113.7(3) . . ? 
C11 C12 Si1 176.9(5) . . ? 
C15 C13 C14 121.7(7) . . ? 
C15 C13 Si1 118.2(5) . . ? 
C14 C13 Si1 112.5(6) . . ? 
C15 C13 H13 99.2 . . ? 
C14 C13 H13 99.2 . . ? 
Si1 C13 H13 99.2 . . ? 
C13 C14 H14A 109.5 . . ? 
C13 C14 H14B 109.5 . . ? 
H14A C14 H14B 109.5 . . ? 
C13 C14 H14C 109.5 . . ? 
H14A C14 H14C 109.5 . . ? 
H14B C14 H14C 109.5 . . ? 
C13 C15 H15A 109.5 . . ? 
C13 C15 H15B 109.5 . . ? 
H15A C15 H15B 109.5 . . ? 
C13 C15 H15C 109.5 . . ? 
H15A C15 H15C 109.5 . . ? 
H15B C15 H15C 109.5 . . ? 
H14D C14' H14E 109.5 . . ? 
H14D C14' H14F 109.5 . . ? 
H14E C14' H14F 109.5 . . ? 
H15D C15' H15E 109.5 . . ? 
H15D C15' H15F 109.5 . . ? 
H15E C15' H15F 109.5 . . ? 
C17 C16 C18 110.3(5) . . ? 
C17 C16 Si1 113.5(4) . . ? 
C18 C16 Si1 113.5(3) . . ? 
C17 C16 H16 106.3 . . ? 
C18 C16 H16 106.3 . . ? 
Si1 C16 H16 106.3 . . ? 
C16 C17 H17A 109.5 . . ? 
C16 C17 H17B 109.5 . . ? 
H17A C17 H17B 109.5 . . ? 
C16 C17 H17C 109.5 . . ? 
H17A C17 H17C 109.5 . . ? 
H17B C17 H17C 109.5 . . ? 
C16 C18 H18A 109.5 . . ? 
C16 C18 H18B 109.5 . . ? 
H18A C18 H18B 109.5 . . ? 
C16 C18 H18C 109.5 . . ? 
H18A C18 H18C 109.5 . . ? 
H18B C18 H18C 109.5 . . ? 
C20 C19 C21 110.6(5) . . ? 
C20 C19 Si1 110.9(4) . . ? 
C21 C19 Si1 113.1(4) . . ? 
C20 C19 H19 107.3 . . ? 
C21 C19 H19 107.3 . . ? 
Si1 C19 H19 107.3 . . ? 
C19 C20 H20A 109.5 . . ? 
C19 C20 H20B 109.5 . . ? 
H20A C20 H20B 109.5 . . ? 
C19 C20 H20C 109.5 . . ? 
H20A C20 H20C 109.5 . . ? 
H20B C20 H20C 109.5 . . ? 
C19 C21 H21A 109.5 . . ? 
C19 C21 H21B 109.5 . . ? 
H21A C21 H21B 109.5 . . ? 
C19 C21 H21C 109.5 . . ? 
H21A C21 H21C 109.5 . . ? 
H21B C21 H21C 109.5 . . ? 
 
_diffrn_measured_fraction_theta_max    0.980 
_diffrn_reflns_theta_full              68.89 
_diffrn_measured_fraction_theta_full   0.980 
_refine_diff_density_max    0.580 
_refine_diff_density_min   -0.495 
_refine_diff_density_rms    0.078 
